# Supplementary material for: Comparison of chikungunya viruses generated using infectious clone or the Infectious Subgenomic Amplicons (ISA) method in Aedes mosquitoes
Source: PubMed Central journal article supplement (PMC6023229; doi:10.1371/journal.pone.0199494), 2018-06-28
Supplement: pone.0199494.s001.pdf [file pone.0199494.s001.pdf]

# Supporting Information S1 File

## Figure A: Mutation distribution

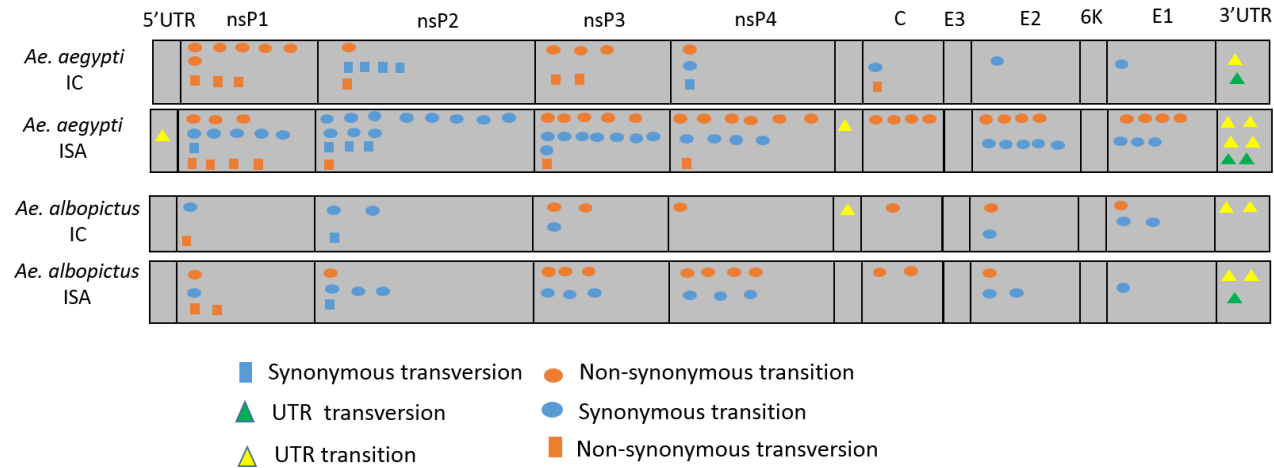

**Figure B: kinetics of IC\_virus dissemination and transmission efficiencies in *Aedes* mosquitoes**

At days 2, 3, 6, 9, and 14 after an infectious blood meal, mosquitoes were sacrificed. Heads and saliva were collected for determination of dissemination (panel A) and transmission (panel B) efficiencies. Five heads were used to assess dissemination efficiencies. 27-30 saliva were used to assess transmission efficiencies except at day 14 post-infection with *Ae. albopictus* mosquitoes (n=5).

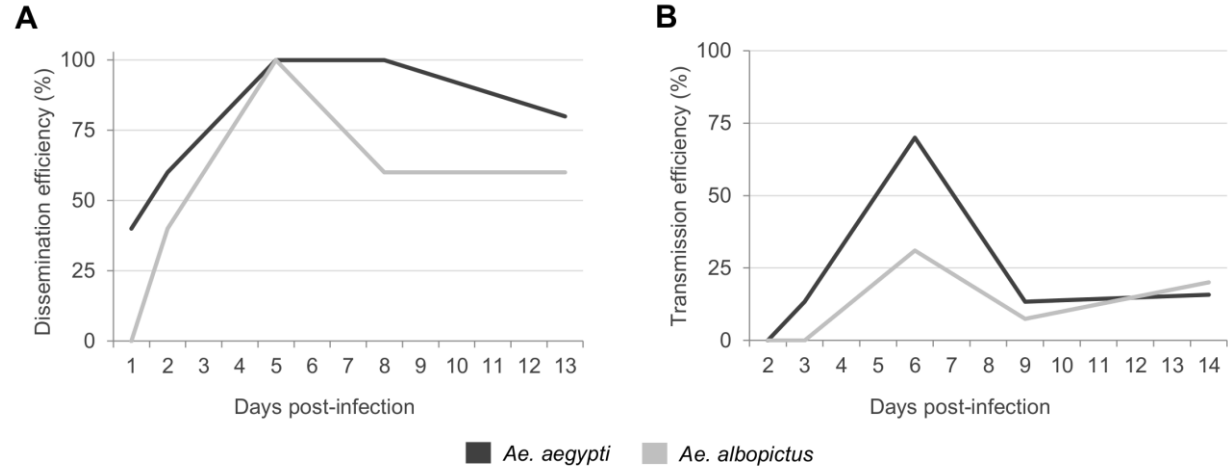

**Table A: List of the mutations detected in this study**

\* : Mosquito heads (*Ae. Aegypti* or *albopictus*) ; Cell Sup. means cell supernatant (virus stock used to infect mosquitoes)

| Nucleotide position | Dpi | Region | Nucleotide change | AA change | Substitution frequency | Sample*        | Mosquito identification number | Reverse genetic method |
|---------------------|-----|--------|-------------------|-----------|------------------------|----------------|--------------------------------|------------------------|
| 25                  | J6  | 5'UTR  | C→T               | -         | 0,02                   | Ae. aegypti    | 19                             | ISA                    |
| 502                 | J6  | nsp1   | A→G               | -         | 0,03                   | Ae. aegypti    | 19                             | ISA                    |
| 502                 | J6  | nsp1   | A→G               | -         | 0,44                   | Ae. albopictus | 28                             | ISA                    |
| 502                 | -   | nsp1   | A→G               | -         | 0,21                   | Cell Sup.      | -                              | ISA                    |
| 540                 | J6  | nsp1   | C→T               | A→V       | 0,04                   | Ae. aegypti    | 20                             | IC                     |
| 546                 | J6  | nsp1   | A→T               | H→L       | 0,04                   | Ae. aegypti    | 20                             | IC                     |
| 710                 | -   | nsp1   | T→C               | -         | 0,03                   | Cell Sup.      | -                              | ISA                    |
| 836                 | J6  | nsp1   | C→T               | -         | 0,99                   | Ae. aegypti    | 18                             | ISA                    |
| 836                 | J6  | nsp1   | C→T               | -         | 0,99                   | Ae. aegypti    | 17                             | ISA                    |
| 856                 | J9  | nsp1   | G→A               | -         | 0,15                   | Ae. aegypti    | 6                              | ISA                    |
| 881                 | -   | nsp1   | A→C               | -         | 0,03                   | Cell Sup.      | -                              | ISA                    |
| 1105                | -   | nsp1   | C→A               | -         | 0,03                   | Cell Sup.      | -                              | ISA                    |
| 1113                | J6  | nsp1   | T→G               | L→R       | 0,02                   | Ae. aegypti    | 21                             | IC                     |
| 1113                | J6  | nsp1   | T→G               | L→R       | 0,02                   | Ae. aegypti    | 23                             | IC                     |
| 1113                | J6  | nsp1   | T→G               | L→R       | 0,02                   | Ae. aegypti    | 21                             | ISA                    |
| 1113                | J6  | nsp1   | T→G               | L→R       | 0,02                   | Ae. aegypti    | 20                             | ISA                    |
| 1113                | J6  | nsp1   | T→G               | L→R       | 0,03                   | Ae. aegypti    | 22                             | ISA                    |
| 1247                | J6  | nsp1   | T→C               | F→L       | 0,03                   | Ae. aegypti    | 20                             | IC                     |
| 1247                | J6  | nsp1   | T→C               | F→L       | 0,04                   | Ae. aegypti    | 21                             | IC                     |
| 1247                | J6  | nsp1   | T→C               | F→L       | 0,03                   | Ae. aegypti    | 23                             | IC                     |
| 1247                | J6  | nsp1   | T→C               | F→L       | 0,03                   | Ae. aegypti    | 24                             | IC                     |
| 1247                | J6  | nsp1   | T→C               | F→L       | 0,03                   | Ae. aegypti    | 25                             | IC                     |
| 1247                | J6  | nsp1   | T→C               | F→L       | 0,02                   | Ae. aegypti    | 21                             | ISA                    |
| 1247                | J6  | nsp1   | T→C               | F→L       | 0,02                   | Ae. aegypti    | 20                             | ISA                    |
| 1247                | J6  | nsp1   | T→C               | F→L       | 0,03                   | Ae. aegypti    | 18                             | ISA                    |
| 1247                | J6  | nsp1   | T→C               | F→L       | 0,02                   | Ae. aegypti    | 24                             | ISA                    |
| 1247                | J6  | nsp1   | T→C               | F→L       | 0,03                   | Ae. aegypti    | 17                             | ISA                    |
| 1405                | J6  | nsp1   | T→G               | -         | 0,99                   | Ae. aegypti    | 21                             | ISA                    |
| 1503                | J6  | nsp1   | C→A               | P→Q       | 0,05                   | Ae. albopictus | 4                              | ISA                    |
| 1525                | J6  | nsp1   | C→T               | -         | 0,93                   | Ae. aegypti    | 22                             | ISA                    |
| 1590                | J6  | nsp1   | T→G               | L→R       | 0,03                   | Ae. aegypti    | 19                             | ISA                    |
| 1590                | J6  | nsp1   | T→G               | L→R       | 0,44                   | Ae. albopictus | 28                             | ISA                    |
| 1590                | -   | nsp1   | T→G               | L→R       | 0,22                   | Cell Sup.      | -                              | ISA                    |
| 1659                | J6  | nsp1   | A→G               | Q→R       | 0,99                   | Ae. albopictus | 3                              | ISA                    |
| 1711                | J6  | nsp2   | C→T               | -         | 0,97                   | Ae. aegypti    | 24                             | ISA                    |

|      |    |      |     |     |      |                |    |     |
|------|----|------|-----|-----|------|----------------|----|-----|
| 1966 | J9 | nsp2 | A→C | K→T | 0,04 | Ae. aegypti    | 17 | IC  |
| 2188 | J6 | nsp2 | A→C | -   | 0,02 | Ae. aegypti    | 20 | IC  |
| 2188 | J6 | nsp2 | A→C | -   | 0,03 | Ae. aegypti    | 21 | IC  |
| 2188 | J6 | nsp2 | A→C | -   | 0,02 | Ae. aegypti    | 22 | IC  |
| 2188 | J6 | nsp2 | A→C | -   | 0,02 | Ae. aegypti    | 23 | IC  |
| 2188 | J6 | nsp2 | A→C | -   | 0,02 | Ae. albopictus | 2  | IC  |
| 2188 | J6 | nsp2 | A→C | -   | 0,02 | Ae. aegypti    | 18 | ISA |
| 2188 | J6 | nsp2 | A→C | -   | 0,03 | Ae. aegypti    | 17 | ISA |
| 2188 | J6 | nsp2 | A→C | -   | 0,03 | Ae. aegypti    | 22 | ISA |
| 2188 | J6 | nsp2 | A→C | -   | 0,02 | Ae. albopictus | 28 | ISA |
| 2192 | J6 | nsp2 | A→C | I→L | 0,02 | Ae. aegypti    | 21 | ISA |
| 2239 | J6 | nsp2 | A→T | -   | 0,03 | Ae. aegypti    | 19 | ISA |
| 2346 | J9 | nsp3 | T→C | M→T | 0,04 | Ae. aegypti    | 18 | IC  |
| 2458 | J6 | nsp2 | T→C | -   | 0,03 | Ae. aegypti    | 19 | ISA |
| 2458 | J6 | nsp2 | T→C | -   | 0,99 | Ae. aegypti    | 18 | ISA |
| 2458 | J6 | nsp2 | T→C | -   | 0,99 | Ae. aegypti    | 21 | ISA |
| 2458 | J6 | nsp2 | T→C | -   | 0,99 | Ae. aegypti    | 17 | ISA |
| 2458 | J6 | nsp2 | T→C | -   | 0,03 | Ae. albopictus | 4  | ISA |
| 2458 | J6 | nsp2 | T→C | -   | 0,07 | Ae. albopictus | 28 | ISA |
| 2458 | -  | nsp2 | T→C | -   | 0,28 | Cell Sup.      | -  | ISA |
| 2592 | J6 | nsp2 | T→C | V→A | 0,02 | Ae. aegypti    | 20 | IC  |
| 2743 | J9 | nsp2 | C→T | -   | 0,97 | Ae. aegypti    | 2  | ISA |
| 2890 | J6 | nsp2 | T→C | -   | 0,12 | Ae. albopictus | 5  | ISA |
| 3068 | J6 | nsp2 | A→G | S→G | 0,7  | Ae. albopictus | 27 | ISA |
| 3424 | J6 | nsp2 | C→T | -   | 0,98 | Ae. aegypti    | 21 | ISA |
| 4027 | J6 | nsp2 | C→T | -   | 0,02 | Ae. aegypti    | 20 | ISA |
| 4027 | J6 | nsp2 | C→T | -   | 0,75 | Ae. aegypti    | 19 | ISA |
| 4075 | J6 | nsp2 | T→C | -   | 0,99 | Ae. aegypti    | 18 | ISA |
| 4075 | J6 | nsp2 | T→C | -   | 0,99 | Ae. aegypti    | 17 | ISA |
| 4270 | J6 | nsp3 | A→G | -   | 0,02 | Ae. aegypti    | 19 | ISA |
| 4270 | J6 | nsp3 | A→G | -   | 0,99 | Ae. aegypti    | 23 | ISA |
| 4270 | J9 | nsp3 | A→G | -   | 0,99 | Ae. aegypti    | 5  | ISA |
| 4271 | J6 | nsp3 | A→G | I→V | 0,02 | Ae. albopictus | 28 | ISA |
| 4339 | J6 | nsp3 | C→T | -   | 0,99 | Ae. aegypti    | 23 | ISA |
| 4495 | J6 | nsp3 | C→T | -   | 0,02 | Ae. albopictus | 28 | ISA |
| 4639 | J9 | nsp3 | A→G | -   | 0,99 | Ae. aegypti    | 2  | ISA |
| 4639 | J9 | nsp3 | A→G | -   | 0,99 | Ae. aegypti    | 6  | ISA |
| 4639 | J9 | nsp3 | A→G | -   | 0,99 | Ae. aegypti    | 7  | ISA |
| 4639 | J6 | nsp3 | A→G | -   | 0,02 | Ae. albopictus | 28 | ISA |
| 5243 | J6 | nsp3 | T→C | S→P | 0,04 | Ae. aegypti    | 18 | ISA |
| 5243 | J6 | nsp3 | T→C | S→P | 0,99 | Ae. aegypti    | 19 | ISA |

|      |    |         |     |     |      |                |    |     |
|------|----|---------|-----|-----|------|----------------|----|-----|
| 5243 | J6 | nsp3    | T→C | S→P | 0,99 | Ae. aegypti    | 21 | ISA |
| 5243 | J6 | nsp3    | T→C | S→P | 0,99 | Ae. aegypti    | 17 | ISA |
| 5243 | J6 | nsp3    | T→C | S→P | 0,03 | Ae. albopictus | 4  | ISA |
| 5266 | J6 | nsp3    | A→G | -   | 0,99 | Ae. albopictus | 3  | ISA |
| 5486 | J6 | nsp3    | T→C | S→P | 0,03 | Ae. aegypti    | 19 | ISA |
| 5486 | J6 | nsp3    | T→C | S→P | 0,45 | Ae. albopictus | 28 | ISA |
| 5601 | J9 | nsp3    | C→T | T→I | 0,02 | Ae. aegypti    | 17 | IC  |
| 5641 | J6 | nsp3    | G→A | -   | 0,02 | Ae. albopictus | 28 | ISA |
| 5643 | J6 | nsp3    | T→C | L→S | 0,79 | Ae. aegypti    | 21 | IC  |
| 5663 | J6 | nsp3    | G→T | G→W | 0,02 | Ae. aegypti    | 23 | IC  |
| 5663 | J6 | nsp3    | G→T | G→W | 0,02 | Ae. aegypti    | 24 | IC  |
| 5663 | J6 | nsp3    | G→T | G→W | 0,02 | Ae. aegypti    | 19 | ISA |
| 5933 | J6 | nsp4    | T→A | S→T | 0,04 | Ae. aegypti    | 21 | ISA |
| 5968 | J6 | nsp4    | A→G | -   | 0,99 | Ae. albopictus | 3  | ISA |
| 6547 | J6 | nsp4    | A→G | -   | 0,94 | Ae. aegypti    | 17 | ISA |
| 6547 | J6 | nsp4    | A→G | -   | 0,03 | Ae. aegypti    | 19 | ISA |
| 6547 | J6 | nsp4    | A→G | -   | 0,94 | Ae. aegypti    | 18 | ISA |
| 6547 | J6 | nsp4    | A→G | -   | 0,96 | Ae. aegypti    | 21 | ISA |
| 6547 | J6 | nsp4    | A→G | -   | 0,02 | Ae. albopictus | 4  | ISA |
| 6547 | J6 | nsp4    | A→G | -   | 0,05 | Ae. albopictus | 28 | ISA |
| 6766 | J9 | nsp4    | T→C | V→A | 0,06 | Ae. aegypti    | 17 | IC  |
| 6923 | J6 | nsp4    | A→G | T→A | 0,88 | Ae. aegypti    | 19 | ISA |
| 6923 | J6 | nsp4    | A→G | T→A | 0,99 | Ae. aegypti    | 20 | ISA |
| 6923 | J6 | nsp4    | A→G | T→A | 0,99 | Ae. aegypti    | 24 | ISA |
| 6923 | J9 | nsp4    | A→G | T→A | 0,99 | Ae. aegypti    | 1  | ISA |
| 6923 | J9 | nsp4    | A→G | T→A | 0,99 | Ae. aegypti    | 4  | ISA |
| 6923 | J6 | nsp4    | A→G | T→A | 0,97 | Ae. albopictus | 4  | ISA |
| 6923 | J6 | nsp4    | A→G | T→A | 0,99 | Ae. albopictus | 5  | ISA |
| 6923 | J6 | nsp4    | A→G | T→A | 0,38 | Ae. albopictus | 27 | ISA |
| 6923 | J6 | nsp4    | A→G | T→A | 0,39 | Ae. albopictus | 28 | ISA |
| 6923 | -  | nsp4    | A→G | T→A | 0,23 | Cell Sup.      | -  | ISA |
| 7174 | J6 | nsp4    | T→C | -   | 0,81 | Ae. aegypti    | 21 | IC  |
| 7490 | J9 | nsp4    | G→T | -   | 0,99 | Ae. aegypti    | 21 | IC  |
| 7540 | J9 | J       | C→T | -   | 0,99 | Ae. aegypti    | 6  | ISA |
| 7628 | J6 | capside | C→T | P→L | 0,98 | Ae. aegypti    | 17 | ISA |
| 7628 | J6 | capside | C→T | P→L | 0,04 | Ae. aegypti    | 19 | ISA |
| 7628 | J6 | capside | C→T | P→L | 0,98 | Ae. aegypti    | 21 | ISA |
| 7628 | J6 | capside | C→T | P→V | 0,98 | Ae. aegypti    | 18 | ISA |
| 7628 | J6 | capside | C→T | P→L | 0,02 | Ae. albopictus | 4  | ISA |
| 7628 | J6 | capside | C→T | P→L | 0,08 | Ae. albopictus | 28 | ISA |
| 7628 | -  | capside | C→T | P→L | 0,28 | Cell Sup.      | -  | ISA |

|       |    |       |     |     |      |                |    |     |
|-------|----|-------|-----|-----|------|----------------|----|-----|
| 8397  | J6 | E3    | C→T | -   | 0,02 | Ae. aegypti    | 23 | IC  |
| 8612  | -  | E2    | A→G | E→G | 0,02 | Cell Sup.      | -  | ISA |
| 8766  | J6 | E2    | A→G | -   | 0,99 | Ae. aegypti    | 17 | ISA |
| 8766  | J6 | E2    | A→G | -   | 0,03 | Ae. aegypti    | 19 | ISA |
| 8766  | J6 | E2    | A→G | -   | 0,99 | Ae. aegypti    | 18 | ISA |
| 8766  | J6 | E2    | A→G | -   | 0,99 | Ae. aegypti    | 21 | ISA |
| 8766  | J6 | E2    | A→G | -   | 0,02 | Ae. albopictus | 4  | ISA |
| 8766  | J6 | E2    | A→G | -   | 0,66 | Ae. albopictus | 28 | ISA |
| 8766  | -  | E2    | A→G | -   | 0,15 | Cell Sup.      | -  | ISA |
| 9100  | J9 | E2    | A→G | N→D | 0,99 | Ae. aegypti    | 2  | ISA |
| 9100  | J9 | E2    | A→G | N→D | 0,99 | Ae. aegypti    | 6  | ISA |
| 9100  | J9 | E2    | A→G | N→D | 0,99 | Ae. aegypti    | 7  | ISA |
| 9100  | J6 | E2    | A→G | N→D | 0,03 | Ae. albopictus | 28 | ISA |
| 9100  | -  | E2    | A→G | N→D | 0,1  | Cell Sup.      | -  | ISA |
| 9360  | J9 | E2    | C→T | -   | 0,07 | Ae. aegypti    | 4  | ISA |
| 9505  | J6 | E2    | C→T | P→S | 0,03 | Ae. aegypti    | 24 | ISA |
| 9690  | -  | E2    | T→C | -   | 0,02 | Cell Sup.      | -  | ISA |
| 9795  | J9 | E2    | C→T | -   | 0,09 | Ae. aegypti    | 17 | IC  |
| 10217 | J9 | E1    | A→G | D→G | 0,02 | Ae. aegypti    | 2  | ISA |
| 10402 | J6 | E1    | T→C | Y→H | 0,04 | Ae. aegypti    | 23 | ISA |
| 10671 | J6 | E1    | G→A | -   | 0,99 | Ae. albopictus | 14 | IC  |
| 10719 | J9 | E1    | T→C | -   | 0,98 | Ae. aegypti    | 6  | ISA |
| 10719 | J9 | E1    | T→C | -   | 0,99 | Ae. aegypti    | 2  | ISA |
| 10719 | J9 | E1    | T→C | -   | 0,99 | Ae. aegypti    | 7  | ISA |
| 10719 | J6 | E1    | T→C | -   | 0,02 | Ae. albopictus | 28 | ISA |
| 10761 | J9 | E1    | A→G | -   | 0,07 | Ae. aegypti    | 21 | IC  |
| 10943 | J6 | E1    | T→C | I→T | 0,02 | Ae. aegypti    | 17 | ISA |
| 10943 | J6 | E1    | T→C | I→T | 0,02 | Ae. aegypti    | 18 | ISA |
| 11137 | J9 | E2    | C→A | P→T | 0,02 | Ae. aegypti    | 21 | IC  |
| 11315 | J6 | 3'UTR | T→C | -   | 0,12 | Ae. albopictus | 28 | ISA |
| 11329 | J6 | 3'UTR | T→G | -   | 0,02 | Ae. aegypti    | 21 | ISA |
| 11490 | J6 | 3'UTR | T→A | -   | 0,06 | Ae. albopictus | 4  | ISA |
| 11550 | J6 | 3'UTR | T→C | -   | 0,8  | Ae. aegypti    | 21 | IC  |
| 11557 | J9 | 3'UTR | C→A | -   | 0,04 | Ae. aegypti    | 21 | IC  |
| 11557 | J6 | 3'UTR | C→A | -   | 0,08 | Ae. aegypti    | 17 | ISA |
| 11642 | J9 | 3'UTR | T→C | -   | 0,99 | Ae. aegypti    | 5  | ISA |
| 11644 | J9 | 3'UTR | A→G | -   | 0,99 | Ae. aegypti    | 2  | ISA |
| 11644 | J9 | 3'UTR | A→G | -   | 0,99 | Ae. aegypti    | 6  | ISA |
| 11644 | J9 | 3'UTR | A→G | -   | 0,99 | Ae. aegypti    | 7  | ISA |
| 11644 | J6 | 3'UTR | A→G | -   | 0,02 | Ae. albopictus | 28 | ISA |
| 11644 | -  | 3'UTR | A→G | -   | 0,1  | Cell Sup.      | -  | ISA |
